1 **Intraspecific diversity loss in a predator species alters prey community structure and**  
2 **ecosystem functions**

3

4 Allan Raffard<sup>1,2</sup>, Julien Cucherousset<sup>3</sup>, José M. Montoya<sup>1</sup>, Murielle Richard<sup>1</sup>, Samson Acoca-  
5 Pidolle<sup>1</sup>, Camille Poésy<sup>1</sup>, Alexandre Garreau<sup>1</sup>, Frédéric Santoul<sup>2</sup> & Simon Blanchet<sup>1</sup>.

6

7 <sup>1</sup> CNRS, Université Toulouse III Paul Sabatier, Station d'Écologie Théorique et Expérimentale du  
8 CNRS à Moulis, UMR-5321, F-09200 Moulis, France.

9 <sup>2</sup>EcoLab, Université de Toulouse, CNRS, INPT, UPS, Toulouse, France

10 <sup>3</sup> CNRS, Université Toulouse III Paul Sabatier, UMR-5174 EDB (Laboratoire Evolution & Diversité  
11 Biologique), 118 route de Narbonne, F-31062, Toulouse, France.

12 **Corresponding author:**

13 Allan Raffard

14 Station d'Ecologie Théorique et Experimentale du CNRS à Moulis.

15 UMR-5321(CNRS-UPS)

16 2 route du CNRS, F-09200 Moulis, France

17 Phone: (+33) 5.61.55.67.47

18 E-mail: [allan.raffard@sete.cnrs.fr](mailto:allan.raffard@sete.cnrs.fr); [allan.raffard@uclouvain.be](mailto:allan.raffard@uclouvain.be)

19

20 **Authors' contributions:** AR, JC and SB conceived the study. AR, MR, SA-P, CP and AG  
21 carried out the experiment. AR performed the statistical analyses. AR, JC, JMM, FS and SB  
22 interpreted and discussed the results. AR and SB wrote the article, and all authors made  
23 corrections.

24 **Keywords:** ecosystem functioning, community, genotype, functional traits, intraspecific  
25 diversity, trophic cascade, predator, food chain

26

27 **Abstract**

28 Loss in intraspecific diversity can alter ecosystem functions, but the underlying mechanisms  
29 are still elusive, and intraspecific biodiversity-ecosystem function relationships (iBEFs) have  
30 been restrained to primary producers. Here, we manipulated genetic and functional richness of  
31 a fish consumer (*Phoxinus phoxinus*), to test whether iBEFs exist in consumer species, and  
32 whether they are more likely sustained by genetic or functional richness. We found that both  
33 genotypic and functional richness affected ecosystem functioning, either independently or in  
34 interaction. Loss in genotypic richness reduced benthic invertebrate diversity consistently  
35 across functional richness treatments, whereas it reduced zooplankton diversity only when  
36 functional richness was high. Finally, both losses in genotypic and functional richness altered  
37 essential functions (e.g. decomposition) through trophic cascades. We concluded that iBEFs  
38 lead to substantial top-down effects on entire food chains. The loss of genotypic richness was  
39 similarly prejudicial than the loss of functional richness, probably because it sustains  
40 “cryptic” functional diversity.

41

## 42 **Introduction**

43 Human disturbances associated with global change are increasingly altering  
44 worldwide patterns of species diversity, as well the functions and services provided by  
45 ecosystems (Parmesan 2006; Naeem *et al.* 2009; Isbell *et al.* 2017). Nonetheless changes  
46 observed at the species and ecosystem levels are always preceded by changes in phenotypic  
47 and genotypic composition within plant and animal populations (Clements & Ozgul 2016;  
48 Clements *et al.* 2017; Baruah *et al.* 2019). Accordingly, extremely rapid changes in  
49 intraspecific diversity are currently occurring worldwide (Darimont *et al.* 2009; Mimura *et al.*  
50 2016; Miraldo *et al.* 2016; Leigh *et al.* 2019). Changes in intraspecific diversity can affect  
51 species turnover and composition (Vellend 2005; Vellend & Geber 2005), as well as  
52 ecosystem functioning (Des Roches *et al.* 2018; Raffard *et al.* 2019c). For instance, the loss of  
53 genotypes within primary producers can reduce ecosystem process rates and species diversity  
54 (Crutsinger *et al.* 2006; Johnson *et al.* 2006; Fridley & Grime 2010), suggesting the existence  
55 of biodiversity-ecosystem functioning relationships at the intraspecific level (iBEFs, Hughes  
56 *et al.* 2008; Koricheva & Hayes 2018; Raffard *et al.* 2019c), in addition to the more widely  
57 studied BEFs at the interspecific level.

58 The relationships between intraspecific diversity and ecosystem functioning are  
59 challenging to study and this is primarily because of the confusion between genetic and  
60 functional trait diversity. iBEF studies have initially manipulated genotypic richness within  
61 experimental populations (e.g. Crutsinger *et al.* 2006; Hughes & Stachowicz 2009; Abbott *et al.*  
62 2017). Genetic variability is expected to encapsulate a large proportion of trait variability,  
63 and thus higher genotypic richness should maintain higher functional diversity (Hughes *et al.*  
64 2008). Although this approach allows deciphering the general effects of intraspecific diversity  
65 on ecosystem functioning, it does not provide mechanisms. As a consequence, parallel studies  
66 have directly manipulated functional trait richness within populations, which enabled to

67 determine a direct mechanistic linkage between functional richness and community structure  
68 and ecosystem functioning (Violle *et al.* 2007; Matthews *et al.* 2011). For instance, individual  
69 body mass (and traits covarying with body mass) has strong ecological effects because of the  
70 associated functional differences and resource use complementarity among individuals  
71 (Woodward *et al.* 2005; Hildrew *et al.* 2007; Rudolf *et al.* 2014; Harmon *et al.* 2009; Rudolf  
72 & Rasmussen 2013a). Focusing on specific traits, such as body mass, might conversely blur  
73 the ecological effects of “cryptic” trait variation (i.e. unmeasured functional traits) that is  
74 likely supported by genotypic richness. We therefore argue that manipulating simultaneously  
75 genotypic richness and the diversity of key functional traits such as body mass should allow  
76 assessing whether cryptic trait diversity is ecologically important, and a better mechanistic  
77 understanding of iBEFs.

78         The ecological effects of biodiversity changes are particularly strong when the later  
79 occur at high trophic levels such as secondary consumers or predators. Changes in the  
80 diversity and abundance of predatory species can trigger important effects in functions  
81 supported by lower trophic levels, especially in regulating the abundance of the lower trophic  
82 levels and indirectly ecosystem functioning, such as biomass production (Shurin *et al.* 2002;  
83 Barnes *et al.* 2018). High predator species richness can sometimes favour resource use  
84 complementarity and decrease prey abundance (Cardinale *et al.* 2006; Griffin *et al.* 2013). In  
85 some cases, however, increasing predator richness increases prey abundance through  
86 mechanisms such as predator interference (Sih *et al.* 1998; O’Connor & Bruno 2009), and can  
87 modify multiple ecosystem functions along food webs (Antiqueira *et al.* 2018; Barnes *et al.*  
88 2018). These mechanisms have all been investigated at the interspecific level, but they may  
89 also apply *within* a predatory species (intraspecific diversity), and we can expect relationships  
90 –either positive or negative- between predator intraspecific diversity and the structure of prey  
91 communities, that could subsequently cascade down essential ecosystem functions such as

92 decomposition rate or primary production (Duffy, 2002; Bruno & O'Connor, 2005).  
93 However, it is still difficult to forecast how loss in intraspecific diversity in predatory (and  
94 consumer) species could affect ecosystem functioning, because iBEFs studies have primarily  
95 focused on primary producers (Koricheva & Hayes 2018; Raffard *et al.* 2019c). This is  
96 despite the fact that human activities strongly affect predator and consumer populations, for  
97 instance through harvest or fisheries activities, which may alter ecosystem functioning  
98 through intraspecific changes in traits and genotypes (Hauser *et al.* 2002; Estes *et al.* 2011;  
99 Palkovacs *et al.* 2012, 2018).

100 In this study, we investigated whether a loss in genotypic and functional diversity  
101 within a consumer species at the top of a three-level trophic chain could mediate top-down  
102 effects on key ecosystem functions. In a nine-months mesocosm experiment, we  
103 simultaneously manipulated *genotypic richness* (number of genetic entities) and the *functional*  
104 *richness* (variance in individuals body mass) of experimental populations of a freshwater fish,  
105 the European minnow (*Phoxinus phoxinus*); a common and abundant species with important  
106 ecosystems effects (Miró *et al.* 2018; Raffard *et al.* 2019b). We predicted that increased  
107 functional richness should affect ecological functions; if functional richness captures the  
108 entire functional differences among genotypes, then increasing genotypic richness should not  
109 impact ecological functions further (Fig. 1a). At the opposite, if functional richness does not  
110 capture all the functional differences among genotypes, then increasing genotypic richness  
111 should increase functional diversity and affect ecological functions (Fig. 1b). The ecological  
112 effects of genotypic and functional richness might display different shape following different  
113 predictions based on possible “additive”, “enhancing” or “compensatory” effects (Fig. 1), to  
114 which we compared our experimental findings. Finally, we identified the mechanistic bases of  
115 the ecological effects of genotypic and functional richness. We specifically tested whether the  
116 loss in genotypic and functional richness affected directly populations’ biomass production

117 and community structure, and indirectly ecosystem functioning mediated by changes in  
118 community structure of benthic and pelagic food web.

119

## 120 **Material and methods**

### 121 *Model species*

122 The European minnow (*P. phoxinus*) is a common species occurring across Western Europe,  
123 living in relatively cold water (summer water temperature generally lower than 24°C)  
124 including mountains lakes, small rivers at intermediate altitude and mountain streams (Keith  
125 *et al.* 2011). It is a small-bodied cyprinid fish species (<12 cm long, 4-8 cm long as an adult  
126 in general) playing the role of secondary consumer in most ecosystems (Raffard *et al.* 2020),  
127 with a generalist diet composed of small invertebrates, algae or zooplankton (Frost 1943;  
128 Collin & Fumagalli 2011). Populations of European minnows differed in their genetic and  
129 phenotypic richness (Fourtune *et al.* 2018), and previous works revealed that genetically and  
130 phenotypically unique populations differently affect prey community abundance and  
131 ecosystem functions (Raffard *et al.* 2019b).

132 We selected ten populations from a large river basin in southern France (the Garonne  
133 catchment) based on *a priori* knowledge to maximise both genetic and functional  
134 differentiations among populations (Fourtune *et al.* 2018; Raffard *et al.* 2019a) (Fig. S1).  
135 Specifically, we sampled five populations mainly composed of small-bodied adults (mean  
136 body mass  $\pm$  standard error (SE) = 1.03 g  $\pm$  0.02) and five populations mainly composed of  
137 large-bodied adults (mean body mass  $\pm$  SE = 3.06 g  $\pm$  0.07) (Fig. S2a). These differences in  
138 adult body mass are due to selective pressures from the local environment such as mean water  
139 temperature; the higher the mean water temperature, the smallest the adult body mass due to  
140 increased metabolic rate and an accelerated pace-of-life (Raffard *et al.* 2019a). These

141 populations also display unique genetic characteristic and can each be defined as unique  
142 genetic entities (Fourtune *et al.* 2018; Prunier *et al.* 2019). Each population are geographically  
143 distant, and they will hereafter be each considered as functionally and genetically unique  
144 entity, and intraspecific richness will be manipulated by varying the number of populations in  
145 independent mesocosms (see details below).

146 In September 2017, individuals were collected in each river by electrofishing a 200-m  
147 section and visually selecting 30-50 individuals reflecting the size range of adults. Fish were  
148 maintained at similar density in outdoor tanks for 3 weeks before the start of the experiment.  
149 Fish were fed ad libitum with frozen Chironomidae during this period.

150

#### 151 *Mesocosm experiment*

152 In October 2016, 24 outdoor mesocosms were filled with 900 L of water, and 3 cm of gravel.  
153 Nutrients were added to the mesocosms using 10 mL of solution containing nitrogen and  
154 phosphorus (ratio N:P:K = 3.3:1.1:5.8). Each mesocosm was then inoculated twice (October  
155 2016 and May 2017) with 200 mL of a concentrated solution of phytoplankton and 200 mL of  
156 concentrated solution of zooplankton collected from a unique lake nearby (Lamartine Lake,  
157 France 43°30'21.5"N, 1°20'32.7"E). In May 2017, we introduced three adult pond-snails  
158 (Lymnaeidae) and ten adult isopods (Asellidae) in each mesocosms. They were let uncovered  
159 to allow natural colonization by other invertebrates and community assemblage until the start  
160 of the experiment that occurred approximately 6 months later.

161 In October 2017, eight fish were weighted and introduced in each mesocosm, which  
162 were assigned to one of four treatments according to a full-factorial design with *genotypic*  
163 richness (two levels, *high* and *low* genotypic richness) and *functional* richness (two levels,  
164 *high* and *low* functional richness) as the main factors. Genotypic richness was manipulated by

165 introducing individuals sourced from either two (*low genotypic richness*, four individuals  
166 from each population) or four (*high genotypic richness*, two individuals from each  
167 population) out of the ten populations. These two levels of genotypic richness were selected  
168 as it has previously been shown in a meta-analysis that the effect of intraspecific richness on  
169 ecosystem functioning increases linearly until four/six genotypes and then reaches a plateau  
170 beyond that (Raffard *et al.* 2019c). Since we aimed at testing the effect of richness while  
171 minimizing the effects of population identity, each replicate of each treatment of richness  
172 contained a different (unique) assemblage of populations. Functional richness consisted in  
173 manipulating the body mass of the individuals present in the mesocosms; hence, experimental  
174 populations contained individuals sourced either from large or small populations (i.e., one  
175 functional entity, *low functional richness*), or from both small and large populations (i.e., two  
176 functional entities, *high functional richness*, see Table S1 and Fig. S2 for details on the  
177 different experimental populations). It is noteworthy that populations containing only either  
178 small or large individuals were actually more functionally redundant than populations  
179 containing large and small individuals. Experimental populations hence varied simultaneously  
180 according to their genotypic and functional richness, leading to four treatments.

181         The experiment lasted 30 weeks (210 days) after fish were introduced. Mesocosms  
182 were checked daily for mortality, which was rarely observed over the course of the  
183 experiment. At the end of the experiment, we measured several ecological parameters to  
184 assess effects of genotypic and functional richness on population performance, community  
185 structure and ecosystem functioning:

186         - *Population performance*: All tanks were emptied and we recaptured all remaining  
187 fish to estimate mortality rate ( $1 - \text{nb. survival fish} / \text{nb. introduced fish}$ ; mean per tank  $\pm$   
188 standard error (SE) =  $0.22 \pm 0.01$ ). Fish were weighted to assess fish biomass production  
189 (biomass production = averaged final weight - averaged initial weight) of each experimental



190 population during the experiment. Since individuals with small initial body mass intrinsically  
191 displayed a higher growth rate than large individuals, a standardised biomass production  
192 index was calculated as the residuals of the relationship between biomass production and  
193 initial fish size.

194 - *Community structure*: Zooplankton community structure was quantified by filtering  
195 5 L of water through a 200 µm sieve. Samples were conserved in a 70% ethanol solution and  
196 subsequently identified to the order or family levels, including Cyclopoida, Calanoida,  
197 Daphniidae, Chydoridae and Bosminidae. The diversity of zooplankton was calculated as the  
198 Simpson's diversity ( $D\text{-}zoo$ ) representing the probability that two randomly chosen  
199 individuals belong to different clades.  $D\text{-}zoo$  was calculated as  $1 - \frac{\sum N_i * (N_i - 1)}{N_{tot} * (N_{tot} - 1)}$ , where  $N_{tot}$   
200 was the total number of sampled individuals, and  $N_i$  the number of sampled individuals for  
201 each group (Simpson 1949; Lande 1996). Zooplankton abundance was quantified as the total  
202 number of individuals for all taxa pooled at the tank level.

203 Benthic invertebrates were collected from the mesh bags used to measure  
204 decomposition rates (*see below*), conserved in a 70% ethanol solution, and identified as  
205 Isopoda, Diptera, Gastropoda, Ephemeroptera, Plecoptera, Odonata, Copepoda, Cladocera,  
206 and Ostracoda. The diversity of benthic invertebrates was calculated as the Simpson's  
207 diversity ( $D\text{-}inv$ ). The abundance of benthic invertebrates was quantified as the total number  
208 of individuals for all taxa pooled at the tank level.

209 - *Ecosystem functioning*: Decomposition rate was measured by quantifying the mass  
210 loss of black poplar (*Populus nigra*, a dominant riparian tree in southern France) abscised  
211 leaves (Alp *et al.* 2016). On the 7<sup>th</sup> of March 2018 (19 weeks after the introduction of fish), 4  
212 g of air-dried leaves were put in each mesocosm within a coarse mesh (1 x 1 cm) bag. At the  
213 end of the experiment, the remaining leaf material was removed from the mesocosms, rinsed  
214 with tap water, oven dried at 60°C for three days and weighed to the nearest 0.001 g to assess

215 the loss of biomass. The decomposition rate was calculated as  $k = -\frac{\ln(X)}{t}$  (Alp *et al.* 2016),  
216 where  $X$  is the proportion of litter remaining and  $t$  is the elapsed time in days.

217 Pelagic algae stock was measured as the chlorophyll-a concentration ( $\mu\text{g.L}^{-1}$ ) in the  
218 water column using a multiparametric probe (OTT, Hydrolab DS5®). Five measurements  
219 were taken in each mesocosm and averaged for subsequent analyses. Since phytoplankton are  
220 the main primary producers in these mesocosms (Downing & Leibold 2002), pelagic algae  
221 stock can be considered as a proxy for the biomass of primary producers.

222

### 223 *Statistical analyses*

224 Prior to analysis, the pelagic algae stock (i.e. the chlorophyll-a concentration), zooplankton  
225 and benthic invertebrate abundances were log-transformed to reach normality of models'  
226 residuals. After analyses of outliers, we removed one mesocosm from the final analyses that  
227 displayed outliers for several of the measured variables. Analyses were hence run on 23  
228 replicates.

229 We first assessed the ecological effects of genotypic and functional richness using  
230 mixed effects linear models (LMMs). We ran one model for each ecological parameter as a  
231 dependent variable, and the genotypic richness, functional richness, and the resulting two-  
232 term interaction (that was removed when non-significant) as explanatory variables. Fish  
233 mortality rate during the experiment was included as a fixed effect to control for a potential  
234 effect of final density on ecological processes. To control for the disposition of the tanks  
235 during the experiment, the position of tanks was added as a random term. To compare the  
236 relative strength of a loss in genotypic and functional richness on ecological parameters we  
237 calculated effect sizes. Hedges'  $g$  were computed as follow:  $g = \frac{X_2 - X_1}{S_{pooled}}$ , where  $X_1$  and  $X_2$  are  
238 means of treatments (for each genotypic or functional richness treatment) measured for each

239 ecological parameters respectively, and  $s_{pooled}$  is the pooled standard deviation computed as

240 
$$s_{pooled} = \sqrt{\frac{(n_2-1)s_2^2 + (n_1-1)s_1^2}{n_1+n_2-2}}$$
, where  $n$  is sample size, and  $s^2$  is variance (Nakagawa &

241 Cuthill 2007). An effect size was hence measured for each variable response (and each  
242 treatment), and effect sizes were averaged. The absolute mean effect size for genotypic and  
243 functional richness ( $g_G$  and  $g_S$ , respectively) were compared visually based on 95%  
244 confidence intervals (CI).

245 Secondly, we ran confirmatory path-analysis (Shipley 2009) to assess the direct and  
246 indirect links among intraspecific diversity (genotypic and functional richness), prey  
247 (invertebrates and zooplankton) community structure and ecosystem functioning. We  
248 expected that intraspecific diversity in European minnows affects directly invertebrate  
249 community (both diversity and abundance), and indirectly ecosystem functions  
250 (decomposition rate, algae stock) through trophic cascades. Specifically, we computed two  
251 path analysis: one for the benthic food chain (fish-invertebrates-decomposition), and one for  
252 the pelagic food chain (fish-zooplankton-algae stock) (Fig. S3). The fits of the structural  
253 models were assessed using the  $C$  statistic, that follows a  $\chi^2$  distribution and whose associated  
254  $p$ -value indicates whether the models adequately fit the data or not. Finally, the structural  
255 models were compared to null models that were actually models without the effects of  
256 genotypic and functional richness on community parameters (see Fig. S3) using Akaike  
257 Information Criteria (AIC, Cardon *et al.* 2011; Shipley 2013). This test allows assessing  
258 whether the indirect effects of genotypic and functional richness lead to a better explanation  
259 of the data, and whether trophic cascades were important or not.

260 All statistical analysis were run using R software (R Core Team 2013), LMM were  
261 run using the R-package lme4 (Bates *et al.* 2014), and confirmatory path-analyses were run  
262 using the R-package ggm (Marchetti *et al.* 2020).

263

## 264 **Results**

265 Both genotypic and functional richness of experimental populations significantly  
266 affected several ecological processes (Table 1). At the population level, we found that the  
267 interaction between genotypic and functional richness tended ( $p = 0.057$ ) to alter fish biomass  
268 production of experimental populations (Table 1, Fig. 2a). Specifically, the less diversified  
269 experimental populations (low genotypic richness and low functional richness) displayed a  
270 lower biomass production than all other treatments (Fig. 2a). At the community level, the  
271 diversity of benthic invertebrates was significantly higher in the high genotypic richness  
272 treatment (mean  $D\text{-inv} \pm SE = 0.64 \pm 0.04$ ) than in the low genotypic richness treatment ( $D\text{-}$   
273  $inv \pm SE = 0.53 \pm 0.03$ ), and this pattern was repeatable across functional richness treatments  
274 (Fig. 2d, Table 1). Irrespective of the genotypic richness treatment, mesocosms containing  
275 fish populations with low functional richness had higher diversity of benthic invertebrates  
276 than mesocosms containing fish populations with high functional diversity (Fig. 2d, Table 1).  
277 At the opposite, the diversity of zooplankton ( $D\text{-zoo}$ ) was affected by the interaction between  
278 genotypic and functional richness (Fig. 2e, Table 1). Zooplankton diversity was strikingly  
279 higher in populations with both high genotypic richness and high functional richness (Fig. 2e,  
280 Table 1), suggesting that, in this case, the effect of genotypic richness depended on the  
281 functional richness of experimental fish populations. Benthic invertebrates and zooplankton  
282 abundances were consistently (i.e. across genotypic richness treatment) enhanced when  
283 increasing functional richness (Fig. 2f, g, and Table 1). Genotypic richness of populations did  
284 not affect benthic invertebrates and zooplankton abundances (Fig. 2f, g, and Table 1). A weak  
285 but significant negative effect of functional richness on the pelagic algae stock was detected  
286 (Table 1, Fig. 2c) and there was no significant effects genotypic and functional richness on  
287 decomposition rate (Table 2). Overall, genotypic and functional richness induced ecological

288 effects of similar intensity (mean  $|g_G| = 0.356$ , CIs = 0.043-0.669, and mean  $|g_S| = 0.564$ , CIs  
289 = 0.247-0.882, see Fig. S4 for details).

290 Confirmatory path analyses revealed that effects of intraspecific diversity on  
291 ecosystem functioning were primarily mediated by trophic cascades, through changes in  
292 community structure (Fig. 3). First, genotypic and functional richness affected the diversity  
293 and abundance of benthic invertebrates (Fig. 3), which subsequently and positively affected  
294 the decomposition rate ( $p < 0.001$ , Fig. 4a, b and Table S2). Second, functional richness  
295 positively affected abundance of zooplankton, leading to a decrease in pelagic algae stock ( $p$   
296  $< 0.001$ , Fig. 4c, d, Table S2). Overall, the confirmatory path-analysis confirmed the key role  
297 of intraspecific diversity for both food chains, and its indirect effects for ecosystem functions  
298 (Fig. 3 and Table 2). Indeed, models including genotypic and functional richness reproduced  
299 adequately the causal pathways (Table 2), and their AICs were better than that of the null  
300 models for each ecosystem function (Table 2).

301

## 302 **Discussion**

303 The present study demonstrates that losing intraspecific diversity in a secondary consumer  
304 species has substantial top-down consequences for community structure and ecosystem  
305 functioning in food webs. We showed that both losses in functional (mass) and genotypic  
306 richness sustained these iBEFs, suggesting that differences in mass among individuals (an  
307 important functional trait for food web dynamics, Woodward *et al.* 2005) did not capture the  
308 entire functional space, and thus that genotypic richness encapsulates important and “cryptic”  
309 (unmeasured) functional diversity. The loss of genotypes within consumer populations can  
310 affect both the community structure and the abundance of lower trophic levels, as well as  
311 ecosystem functions with a similar strength than the loss of functional entities (i.e. body

312 mass). Specifically, we found that diversity loss (genotypic and functional) within populations  
313 indirectly affects primary producer biomass and organic matter recycling, two ecosystem  
314 functions forming the bases of food chains. This suggests that intraspecific diversity is a key  
315 but understudied facet of biodiversity as it indirectly sustains BEF relationships, even when  
316 changes in intraspecific diversity occur at the top of the food chains.

317 Our study suggests that genotypic richness can support non-negligible cryptic  
318 functional diversity. Cryptic functional traits, such as metabolic rates or behaviour, can induce  
319 different energetic needs and ultimately affect individual diets (Brown *et al.*, 2004; Careau &  
320 diversity, 2012; Rosenblatt & Schmitz, 2016). Hence, fish with different genotypes may share  
321 obvious functional traits (such as body mass) but may subtly differ in other cryptic functional  
322 traits, making them unique ecologically (Loreau 2001). Although such “ecological  
323 dissimilarity-despite-morphological similarity” has rarely been demonstrated within species,  
324 there is now ample evidence that cryptic species (species being morphologically and  
325 phylogenetically similar) can actually be ecologically unique regarding their influence on  
326 ecosystems (e.g. Fišer *et al.* 2015). Interestingly, this cryptic diversity can interact with  
327 functional richness in various ways (i.e., additive, enhancing, or compensatory) depending on  
328 the ecological parameter considered (i.e., benthic invertebrate diversity, zooplankton  
329 diversity, and fish biomass production, respectively). For instance, we found that genotypic  
330 richness can compensate for the loss of functional diversity for population performance (i.e.,  
331 increase fish biomass production), with high genotypic richness maintaining high biomass  
332 production even when the distribution of body mass in the population is limited. We speculate  
333 that genotypic richness can increase niche variation among individuals, thereby limiting the  
334 loss of biomass production when decreasing functional richness (Duffy *et al.* 2001). These  
335 findings echo and extend studies at the interspecific level demonstrating that phylogenetic  
336 diversity among species explains variance in ecosystem functions that is not explained either

337 by species or functional diversities, suggesting that phylogenetic diversity sustain unmeasured  
338 functional differences among species (Cadotte *et al.* 2012; Mouquet *et al.* 2012; Le  
339 Bagousse-Pinguet *et al.* 2019). We argue that iBEFs are sustained by differences in functional  
340 traits among individuals that can be directly measured (e.g. mass) and/or indirectly captured  
341 through quantification of the genetic pool of individuals composing populations.

342         Accordingly, we showed that genotypic and functional richness can affect  
343 independently (i.e., additively) and consistently community structure, demonstrating that  
344 multiple facets of intraspecific diversity can regulate lower trophic levels. First, genotypic  
345 richness increased diversity benthic invertebrates. This effect was very robust, as it was  
346 repeatable and consistent across functional richness treatments. Genotypic richness probably  
347 enhanced resource partitioning, allowing individuals to forage on a more diverse array of  
348 resources, regulating the abundance of each taxonomic group and leading to a higher diversity  
349 (Duffy, 2002; Johnson *et al.*, 2006; Hughes *et al.* 2008). Second, functional richness led to  
350 increased prey abundance that was repeatable across both communities of benthic  
351 invertebrates and zooplankton. Previous studies at the inter- and intraspecific levels provide  
352 non-consistent predictions, since an increase in consumer diversity can affect either positively  
353 or negatively resource abundance (Sih *et al.* 1998; Griffin *et al.* 2013; Rudolf & Rasmussen  
354 2013b; Antigueira *et al.* 2018; Barnes *et al.* 2018). In our experiment, although functional  
355 richness enhanced prey abundance, it also increased fish biomass production, suggesting that  
356 functionally rich populations did not consume fewer resources than functionally poor  
357 populations. On the opposite, flexible exploitation of resources might occur because European  
358 minnows are omnivorous (Frost 1943; Collin & Fumagalli 2011), their diet probably included  
359 some periphyton, decreasing the predation risk on animal resources. Because the top-down  
360 control of intraspecific diversity on community structure is likely driven by trophic

361 mechanisms, quantifying individual diet and its temporal dynamic in such experiments would  
362 allow making more accurate predictions regarding trophic niche partitioning.

363 Our results further revealed how changes in top consumers' genotypic and functional  
364 richness percolate through the food web and alter ecosystem functions at the basis of the food  
365 chains. Such trophic cascade induced by intraspecific diversity could be driven by a  
366 "classical" (i.e. interspecific) BEF relationship between benthic invertebrate diversity and  
367 decomposition rate (Hooper *et al.* 2005; Gessner *et al.* 2010). Specifically, fish genotypic  
368 richness increased benthic invertebrate diversity that accelerated litter decomposition rate.  
369 The higher decomposition rate of organic matter is likely produced by higher consumption  
370 efficiency through trophic complementarity among clades of invertebrates in diverse  
371 community (Gessner *et al.* 2010). Invertebrate community with a high diversity probably  
372 harboured a high functional diversity (Cadotte *et al.* 2011), and focusing on the functional  
373 type of invertebrates might allow a more precise understanding of this link. These results echo  
374 those reported at the community level and those manipulating richness within primary  
375 producer species (Downing & Leibold 2002; Crutsinger *et al.* 2006), while implying a  
376 modification of top-down effects by intraspecific diversity in consumers. Biodiversity within  
377 consumer species is largely impacted by anthropogenic activities (Miraldo *et al.* 2016),  
378 involving the loss of non-measured functional diversity, which might further lead to  
379 underestimated cascading impacts on ecosystem functioning.

380 In conclusion, we demonstrated that both genetic and functional richness within  
381 consumer populations are important facets of biological diversity, inducing effects on prey  
382 community structure and trophic cascades mediating ecosystem functions. These results are  
383 consistent with previous synthetic works (Koricheva & Hayes 2018; Raffard *et al.* 2019c),  
384 reinforcing the call for considering changes of intraspecific diversity in consumer species as  
385 an important ecological predictor. Importantly, genotypic richness can sustain important



386 cryptic functional diversity, and future investigations should aim at developing a general  
387 framework from genes to ecosystems to better understand the global links existing among the  
388 multiple facets of biodiversity and ecosystem functioning, and ultimately ecosystem services.

389

### 390 **Acknowledgements**

391 We thank Kéoni Saint-Pe and Jérôme G. Prunier for their help for fish sampling. AR is  
392 financially supported by a Doctoral scholarship from the Université Fédérale de Toulouse.  
393 Electrofishing was performed under the authorization of local authorities (Arrêtés  
394 Préfectoraux from the Direction Départementale des Territoires of French departments  
395 Ariège, Haute-Garonne, Tarn, Aveyron, Tarn-et-Garonne, Lot). This work was undertaken at  
396 SETE, which is part of the “Laboratoire d’Excellence” (LABEX) entitled TULIP (ANR-10-  
397 LABX-41).

398

### 399 **Conflict of interest disclosure**

400 The authors of this article declare that they have no financial conflict of interest with the  
401 content of this article.

402

403 **Data availability statement:** Data are available on Figshare 10.6084/m9.figshare.12459065

404

### 405 **References**

- 406 Abbott, J.M., Grosberg, R.K., Williams, S.L. & Stachowicz, J.J. (2017). Multiple dimensions  
407 of intraspecific diversity affect biomass of eelgrass and its associated community.  
408 *Ecology*, 98, 3152–3164.  
409 Alp, M., Cucherousset, J., Buoro, M. & Lecerf, A. (2016). Phenological response of a key  
410 ecosystem function to biological invasion. *Ecol. Lett.*, 19, 519–527.

- 411 Antiqueira, P.A.P., Petchey, O.L. & Romero, G.Q. (2018). Warming and top predator loss  
412 drive ecosystem multifunctionality. *Ecol. Lett.*, 21, 72–82.
- 413 Barnes, A.D., Jochum, M., Lefcheck, J.S., Eisenhauer, N., Scherber, C., O’Connor, M.I., *et*  
414 *al.* (2018). Energy flux: the link between multitrophic biodiversity and ecosystem  
415 functioning. *Trends Ecol. Evol.*, 33, 186–197.
- 416 Baruah, G., Clements, C.F., Guillaume, F. & Ozgul, A. (2019). When do shifts in trait  
417 dynamics precede population declines? *Am. Nat.*, 193, 633–644.
- 418 Bates, D., Maechler, M, Bolker, B & Walker, S. (2014). lme4: Linear mixed-effects models  
419 using Eigen and S4. R package version 1.1-7.
- 420 Brown, J.H., Gillooly, J.F., Allen, A.P., Savage, V.M. & West, G.B. (2004). Toward a  
421 metabolic theory of ecology. *Ecology*, 85, 1771–1789.
- 422 Bruno, J.F. & O’Connor, M.I. (2005). Cascading effects of predator diversity and omnivory in  
423 a marine food web. *Ecol. Lett.*, 8, 1048–1056.
- 424 Cadotte, M.W., Carscadden, K. & Mirotchnick, N. (2011). Beyond species: functional  
425 diversity and the maintenance of ecological processes and services. *J. Appl. Ecol.*, 48,  
426 1079–1087.
- 427 Cadotte, M.W., Dinnage, R. & Tilman, D. (2012). Phylogenetic diversity promotes ecosystem  
428 stability. *Ecology*, 93, S223–S233.
- 429 Cardinale, B.J., Srivastava, D.S., Emmett Duffy, J., Wright, J.P., Downing, A.L., Sankaran,  
430 M., *et al.* (2006). Effects of biodiversity on the functioning of trophic groups and  
431 ecosystems. *Nature*, 443, 989–992.
- 432 Cardon, M., Loot, G., Grenouillet, G. & Blanchet, S. (2011). Host characteristics and  
433 environmental factors differentially drive the burden and pathogenicity of an  
434 ectoparasite: a multilevel causal analysis: Causalities in host-parasite interactions. *J.*  
435 *Anim. Ecol.*, 80, 657–667.
- 436 Careau, V. & Garland, T. (2012). Performance, Personality, and Energetics: Correlation,  
437 Causation, and Mechanism. *Physiol. Biochem. Zool.*, 85, 543–571.
- 438 Clements, C.F., Blanchard, J.L., Nash, K.L., Hindell, M.A. & Ozgul, A. (2017). Body size  
439 shifts and early warning signals precede the historic collapse of whale stocks. *Nat.*  
440 *Ecol. Evol.*, 1, 0188.
- 441 Clements, C.F. & Ozgul, A. (2016). Including trait-based early warning signals helps predict  
442 population collapse. *Nat. Commun.*, 7, 10984.
- 443 Collin, H. & Fumagalli, L. (2011). Evidence for morphological and adaptive genetic  
444 divergence between lake and stream habitats in European minnows ( *Phoxinus*  
445 *phoxinus* , Cyprinidae). *Mol. Ecol.*, 20, 4490–4502.
- 446 Crutsinger, G.M., Collins, M.D., Fordyce, J.A., Gompert, Z., Nice, C.C. & Sanders, N.J.  
447 (2006). Plant genotypic diversity predicts community structure and governs an  
448 ecosystem process. *Science*, 313, 966–968.
- 449 Darimont, C.T., Carlson, S.M., Kinnison, M.T., Paquet, P.C., Reimchen, T.E. & Wilmers,  
450 C.C. (2009). Human predators outpace other agents of trait change in the wild. *Proc.*  
451 *Natl. Acad. Sci.*, 106, 952–954.
- 452 Des Roches, S., Post, D.M., Turley, N.E., Bailey, J.K., Hendry, A.P., Kinnison, M.T., *et al.*  
453 (2018). The ecological importance of intraspecific variation. *Nat. Ecol. Evol.*, 2, 57–  
454 64.
- 455 Downing, A.L. & Leibold, M.A. (2002). Ecosystem consequences of species richness and  
456 composition in pond food web. *Nature*, 416, 837–841.
- 457 Duffy, J.E. (2002). Biodiversity and ecosystem function: the consumer connection. *Oikos*, 99,  
458 201–219.

- 459 Duffy, J.E., Macdonald, K.S., Rhode, J.M. & Parker, J.D. (2001). Grazer diversity, functional  
460 redundancy, and productivity in seagrass beds: an experimental test. *Ecology*, 82,  
461 2417–2434.
- 462 Estes, J.A., Terborgh, J., Brashares, J.S., Power, M.E., Berger, J., Bond, W.J., *et al.* (2011).  
463 Trophic Downgrading of Planet Earth. *Science*, 333, 301–306.
- 464 Fišer, Ž., Altermatt, F., Zakšek, V., Knapič, T. & Fišer, C. (2015). Morphologically Cryptic  
465 Amphipod Species Are “Ecological Clones” at Regional but Not at Local Scale: A  
466 Case Study of Four Niphargus Species. *PLOS ONE*, 10, e0134384.
- 467 Fournet, L., Prunier, J.G., Mathieu-Begne, E., Canto, N., Veysiere, C., Loot, G., *et al.*  
468 (2018). Intraspecific genetic and phenotypic diversity: parallel processes and  
469 correlated patterns?
- 470 Fridley, J.D. & Grime, J.P. (2010). Community and ecosystem effects of intraspecific genetic  
471 diversity in grassland microcosms of varying species diversity. *Ecology*, 91, 2272–  
472 2283.
- 473 Frost, W.E. (1943). The natural history of the minnow, *Phoxinus phoxinus*. *J. Anim. Ecol.*, 12,  
474 139.
- 475 Gessner, M.O., Swan, C.M., Dang, C.K., McKie, B.G., Bardgett, R.D., Wall, D.H., *et al.*  
476 (2010). Diversity meets decomposition. *Trends Ecol. Evol.*, 25, 372–380.
- 477 Griffin, J.N., Byrnes, J.E.K. & Cardinale, B.J. (2013). Effects of predator richness on prey  
478 suppression: a meta-analysis. *Ecology*, 94, 2180–2187.
- 479 Harmon, L.J., Matthews, B., Des Roches, S., Chase, J.M., Shurin, J.B. & Schluter, D. (2009).  
480 Evolutionary diversification in stickleback affects ecosystem functioning. *Nature*, 458,  
481 1167–1170.
- 482 Hauser, L., Adcock, G.J., Smith, P.J., Bernal Ramirez, J.H. & Carvalho, G.R. (2002). Loss of  
483 microsatellite diversity and low effective population size in an overexploited  
484 population of New Zealand snapper (*Pagrus auratus*). *Proc. Natl. Acad. Sci.*, 99,  
485 11742–11747.
- 486 Hildrew, A.G., Raffaelli, D. & Edmonds-Browns, R. (2007). *Body size: the structure and*  
487 *function of aquatic ecosystems*. Cambridge University Press, Cambridge, UK.
- 488 Hooper, D.U., Chapin, F.S., Ewel, J.J., Hector, A., Inchausti, P., Lavorel, S., *et al.* (2005).  
489 Effects of biodiversity on ecosystem functioning: a consensus of current knowledge.  
490 *Ecol. Monogr.*, 75, 3–35.
- 491 Hughes, A.R., Inouye, B.D., Johnson, M.T.J., Underwood, N. & Vellend, M. (2008).  
492 Ecological consequences of genetic diversity. *Ecol. Lett.*, 11, 609–623.
- 493 Hughes, A.R. & Stachowicz, J.J. (2009). Ecological impacts of genotypic diversity in the  
494 clonal seagrass *Zostera marina*. *Ecology*, 90, 1412–1419.
- 495 Isbell, F., Gonzalez, A., Loreau, M., Cowles, J., Diaz, S., Hector, A., *et al.* (2017). Linking  
496 the influence and dependence of people on biodiversity across scales. *Nature*, 546,  
497 65–72.
- 498 Johnson, M.T.J., Lajeunesse, M.J. & Agrawal, A.A. (2006). Additive and interactive effects  
499 of plant genotypic diversity on arthropod communities and plant fitness. *Ecol. Lett.*, 9,  
500 24–34.
- 501 Keith, P., Persat, H., Feunteun, E. & Allardi, J. (2011). *Les poissons d’eau douce de France*.  
502 Muséum National d’Histoire Naturelle and Publications Biotope. Paris and Mèze.
- 503 Koricheva, J. & Hayes, D. (2018). The relative importance of plant intraspecific diversity in  
504 structuring arthropod communities: A meta-analysis. *Funct. Ecol.*, 32, 1704–1717.
- 505 Lande, R. (1996). Statistics and partitioning of species diversity, and similarity among  
506 multiple communities. *Oikos*, 76, 5.
- 507 Le Bagousse-Pinguet, Y., Soliveres, S., Gross, N., Torices, R., Berdugo, M. & Maestre, F.T.  
508 (2019). Phylogenetic, functional, and taxonomic richness have both positive and

- 509 negative effects on ecosystem multifunctionality. *Proc. Natl. Acad. Sci.*, 116, 8419–  
510 8424.
- 511 Leigh, D.M., Hendry, A.P., Vázquez-Domínguez, E. & Friesen, V.L. (2019). Estimated six  
512 per cent loss of genetic variation in wild populations since the industrial revolution.  
513 *Evol. Appl.*, eea.12810.
- 514 Loreau, M. (2001). Biodiversity and Ecosystem Functioning: Current Knowledge and Future  
515 Challenges. *Science*, 294, 804–808.
- 516 Marchetti, G.M., Drton, M. & Sadeghi, K. (2020). ggm: functions for graphical Markov  
517 models. Version 2.5.
- 518 Matthews, B., Narwani, A., Hausch, S., Nonaka, E., Peter, H., Yamamichi, M., *et al.* (2011).  
519 Toward an integration of evolutionary biology and ecosystem science. *Ecol. Lett.*, 14,  
520 690–701.
- 521 Mimura, M., Yahara, T., Faith, D.P., Vázquez-Domínguez, E., Colautti, R.I., Araki, H., *et al.*  
522 (2016). Understanding and monitoring the consequences of human impacts on  
523 intraspecific variation. *Evol. Appl.*, 10, 121–139.
- 524 Miraldo, A., Li, S., Borregaard, M.K., Florez-Rodriguez, A., Gopalakrishnan, S., Rizvanovic,  
525 M., *et al.* (2016). An Anthropocene map of genetic diversity. *Science*, 353, 1532–  
526 1535.
- 527 Miró, A., Sabás, I. & Ventura, M. (2018). Large negative effect of non-native trout and  
528 minnows on Pyrenean lake amphibians. *Biol. Conserv.*, 218, 144–153.
- 529 Mouquet, N., Devictor, V., Meynard, C.N., Munoz, F., Bersier, L.-F., Chave, J., *et al.* (2012).  
530 Ecophylogenetics: advances and perspectives. *Biol. Rev.*, 87, 769–785.
- 531 Naeem, S., Bunker, D.E., Hector, A., Loreau, M. & Perrings, C. (2009). *Biodiversity,*  
532 *Ecosystem Functioning, and Human Wellbeing*. Oxford University Press.
- 533 Nakagawa, S. & Cuthill, I.C. (2007). Effect size, confidence interval and statistical  
534 significance: a practical guide for biologists. *Biol. Rev.*, 82, 591–605.
- 535 O'Connor, M.I. & Bruno, J.F. (2009). Predator richness has no effect in a diverse marine food  
536 web. *J. Anim. Ecol.*, 78, 732–740.
- 537 Palkovacs, E.P., Kinnison, M.T., Correa, C., Dalton, C.M. & Hendry, A.P. (2012). Fates  
538 beyond traits: ecological consequences of human-induced trait change. *Evol. Appl.*, 5,  
539 183–191.
- 540 Palkovacs, E.P., Moritsch, M.M., Contolini, G.M. & Pelletier, F. (2018). Ecology of harvest-  
541 driven trait changes and implications for ecosystem management. *Front. Ecol.*  
542 *Environ.*, 16, 20–28.
- 543 Parmesan, C. (2006). Ecological and evolutionary responses to recent climate change. *Annu.*  
544 *Rev. Ecol. Evol. Syst.*, 37, 637–669.
- 545 Prunier, J.G., Chevalier, M., Raffard, A., Loot, G., Poulet, N. & Blanchet, S. (2019).  
546 *Contemporary loss of genetic diversity in wild fish populations reduces biomass*  
547 *stability over time* (preprint). Ecology.
- 548 R Core Team. (2013). R: a language and environment for statistical computing.
- 549 Raffard, A., Cucherousset, J., Prunier, J.G., Loot, G., Santoul, F. & Blanchet, S. (2019a).  
550 Variability of functional traits and their syndromes in a freshwater fish species (*Phoxinus*  
551 *phoxinus*): The role of adaptive and nonadaptive processes. *Ecol. Evol.*, 9,  
552 2833–2846.
- 553 Raffard, A., Cucherousset, J., Santoul, F., Di Gesu, L. & Blanchet, S. (2019b). Intraspecific  
554 variation alters ecosystem and next-generation performance as much as temperature.  
555 *bioRxiv*.
- 556 Raffard, A., Santoul, F., Blanchet, S. & Cucherousset, J. (2020). Linking intraspecific  
557 variability in trophic and functional niches along an environmental gradient. *Freshw.*  
558 *Biol.*, fwb.13508.

- 559 Raffard, A., Santoul, F., Cucherousset, J. & Blanchet, S. (2019c). The community and  
560 ecosystem consequences of intraspecific diversity: a meta-analysis. *Biol. Rev.*, 94,  
561 648–661.
- 562 Rosenblatt, A.E. & Schmitz, O.J. (2016). Climate change, nutrition, and bottom-up and top-  
563 down food web processes. *Trends Ecol. Evol.*, 31, 965–975.
- 564 Rudolf, V.H.W. & Rasmussen, N.L. (2013a). Ontogenetic functional diversity: Size structure  
565 of a keystone predator drives functioning of a complex ecosystem. *Ecology*, 94, 1046–  
566 1056.
- 567 Rudolf, V.H.W. & Rasmussen, N.L. (2013b). Population structure determines functional  
568 differences among species and ecosystem processes. *Nat. Commun.*, 4.
- 569 Rudolf, V.H.W., Rasmussen, N.L., Dibble, C.J. & Van Allen, B.G. (2014). Resolving the  
570 roles of body size and species identity in driving functional diversity. *Proc. R. Soc. B*  
571 *Biol. Sci.*, 281, 20133203.
- 572 Shipley, B. (2009). Confirmatory path analysis in a generalized multilevel context. *Ecology*,  
573 90, 363–368.
- 574 Shipley, B. (2013). The AIC model selection method applied to path analytic models  
575 compared using ad-separation test. *Ecology*, 94, 560–564.
- 576 Shurin, J.B., Borer, E.T., Seabloom, E.W., Anderson, K., Blanchette, C.A., Broitman, B., *et*  
577 *al.* (2002). A cross-ecosystem comparison of the strength of trophic cascades. *Ecol.*  
578 *Lett.*, 5, 785–791.
- 579 Sih, A., Englund, G. & Wooster, D. (1998). Emergent impacts of multiple predators on prey.  
580 *Trends Ecol. Evol.*, 13, 350–355.
- 581 Simpson, E.H. (1949). Measurement of diversity. *Nature*, 163, 688.
- 582 Vellend, M. (2005). Species diversity and genetic diversity: parallel processes and correlated  
583 patterns. *Am. Nat.*, 166, 199–215.
- 584 Vellend, M. & Geber, M.A. (2005). Connections between species diversity and genetic  
585 diversity. *Ecol. Lett.*, 8, 767–781.
- 586 Violle, C., Navas, M.-L., Vile, D., Kazakou, E., Fortunel, C., Hummel, I., *et al.* (2007). Let  
587 the concept of trait be functional! *Oikos*, 116, 882–892.
- 588 Woodward, G., Ebenman, B., Emmerson, M., Montoya, J., Olesen, J., Valido, A., *et al.*  
589 (2005). Body size in ecological networks. *Trends Ecol. Evol.*, 20, 402–409.
- 590  
591

592 **Figure captions**

593 **Fig. 1.** Predicted ecological effects of genotypic richness in relation with functional richness.  
594 Functional richness is assumed to positively affect ecological functions, whereas genotypic  
595 richness might have different effects depending on it support cryptic functional diversity.  
596 First, if functional richness does capture the essential of the functional differences among  
597 genotypes, then genotypic richness would have no ecological effects (a). Second, if genotypic  
598 richness supports cryptic functional diversity, the effects could be (b) additive, (c) enhancing,  
599 or (d) compensatory.

600

601 **Fig. 2.** Effects of genotypic and functional richness on populations biomass production index  
602 (a), decomposition rate (b), algae stock (c), diversity of benthic invertebrates (e), diversity of  
603 zooplankton (f), abundance of benthic invertebrates (g), and abundance of zooplankton (h).  
604 Error bars represent  $\pm 1$  SE.

605

606 **Fig. 3.** Causal pathways between genotypic richness, functional richness, community  
607 structure, and ecosystem functioning. Two models have been run separately on decomposition  
608 rate (a), and pelagic algae stock (b). Only significant links are drawn, blue arrows represent  
609 positive links, and yellow arrows negative links.

610

611 **Fig. 4.** Effects of the diversity (a) and the abundance (b) of benthic invertebrates on  
612 decomposition rate; and effects of the diversity and the abundance of zooplankton on pelagic  
613 algae stocks (c and d, respectively). Points are partial residuals extracted from models  
614 described in the statistical analysis section (see also Table S2). Straight lines represent the

615 slope predicted by the models (see statistical analyses) when significant ( $\alpha < 0.05$ ), and grey

616 shadows represent 95% CIs.

617

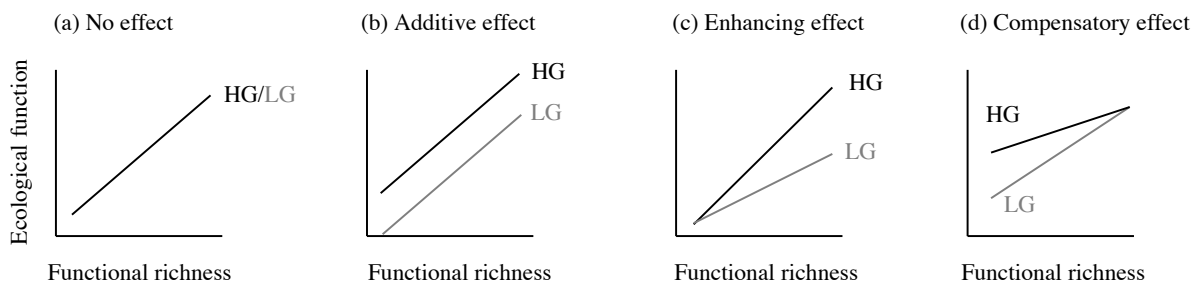

HG = High genotypic richness  
LG = Low genotypic richness

618

619 **Fig. 1.**

620



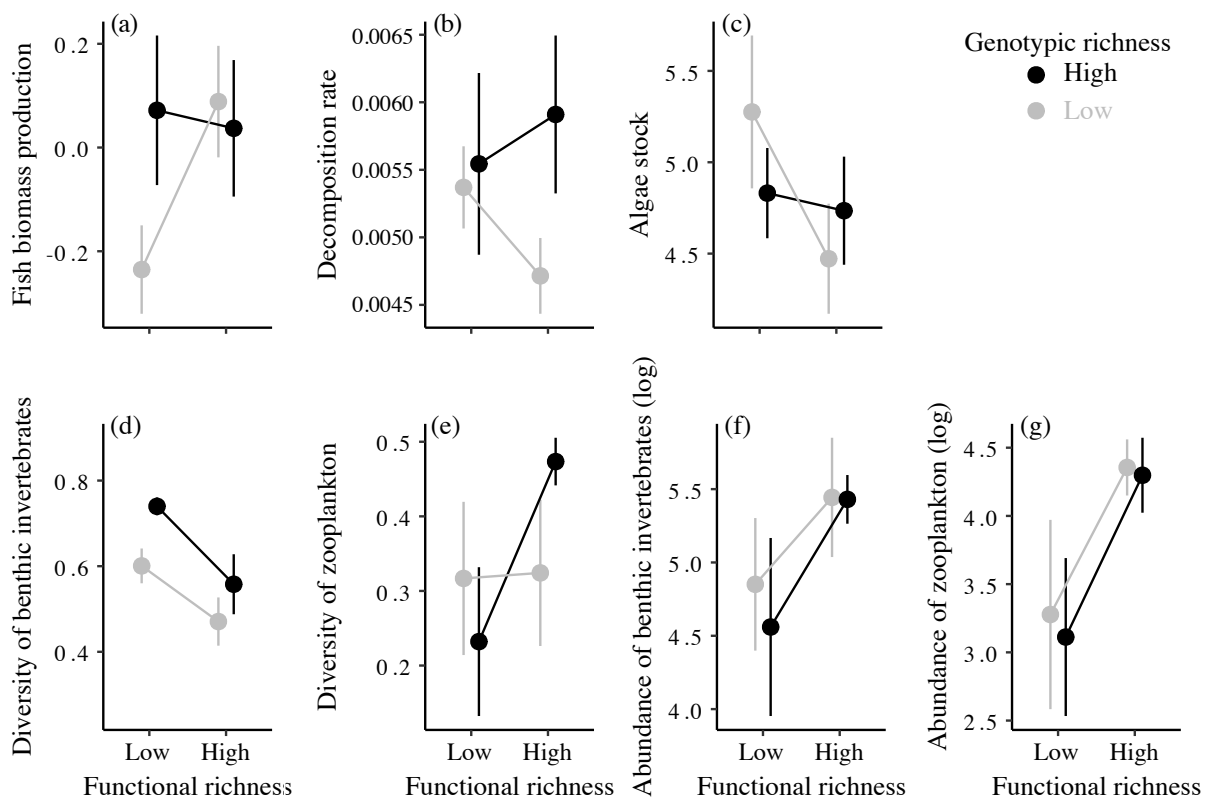

621  
622 **Fig. 2.**

623

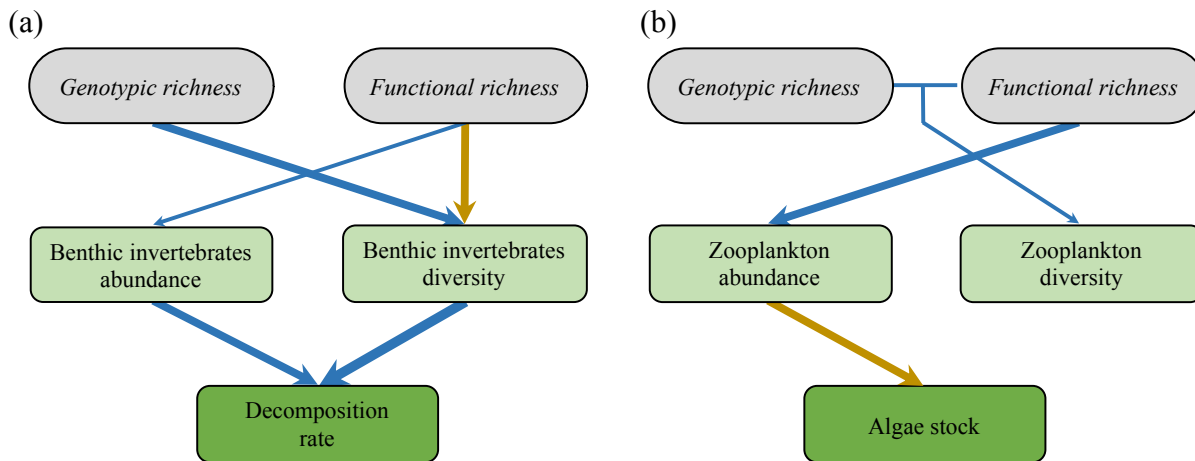

624  
625  
626

**Fig. 3**

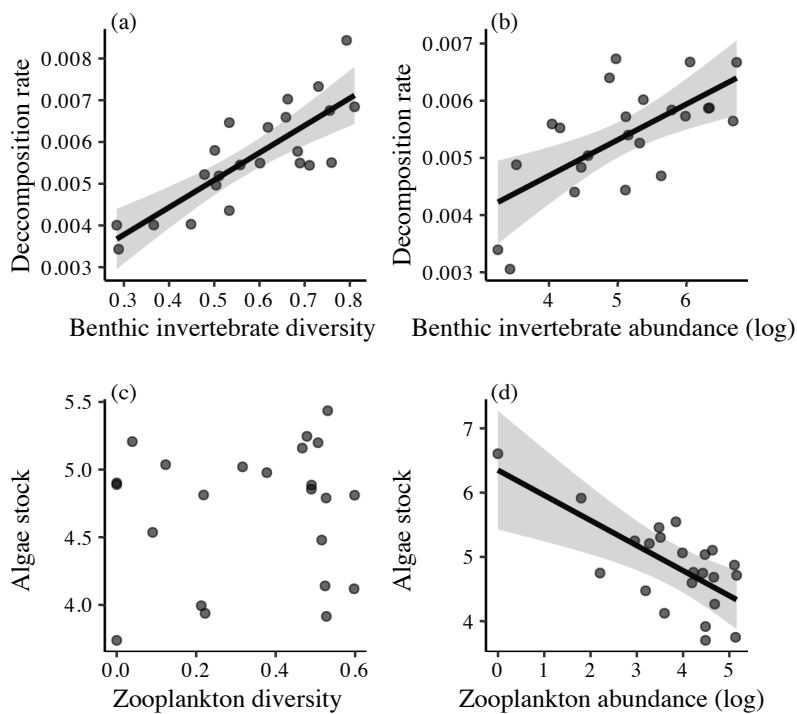

627  
628  
629

**Fig. 4.**

630 **Table 1.** Results of the mixed effect linear models quantifying the relationships between  
 631 genotypic richness, functional richness and ecological parameters. Significant -and near  
 632 significant- *p*-values are displayed in bold. Interaction terms were removed from the model  
 633 when not significant.

634

| Response                        | Effect                     | <i>p</i> -value | $\chi^2$ , d.f. |
|---------------------------------|----------------------------|-----------------|-----------------|
| Fish biomass production         | Genotypic richness         | 0.301           | (1.071, 1)      |
|                                 | Functional richness        | 0.634           | (0.227, 1)      |
|                                 | <b>Genotypic richness*</b> | <b>0.057</b>    | (3.621, 1)      |
|                                 | <b>Functional richness</b> |                 |                 |
| Benthic invertebrates diversity | <b>Mortality</b>           | <b>0.023</b>    | (5.196, 1)      |
|                                 | <b>Genotypic richness</b>  | <b>0.007</b>    | (7.152, 1)      |
|                                 | <b>Functional richness</b> | <b>0.002</b>    | (9.484, 1)      |
| Zooplankton diversity           | Mortality                  | 0.212           | (1.551, 1)      |
|                                 | <b>Genotypic richness</b>  | <b>0.052</b>    | (3.756, 1)      |
|                                 | <b>Functional richness</b> | <b>0.004</b>    | (8.163, 1)      |
|                                 | <b>Genotypic richness*</b> | <b>0.038</b>    | (4.287, 1)      |
| Benthic invertebrates abundance | <b>Functional richness</b> |                 |                 |
|                                 | Mortality                  | 0.851           | (0.035, 1)      |
|                                 | <b>Genotypic richness</b>  | <b>0.300</b>    | (1.072, 1)      |
| Zooplankton abundance           | <b>Functional richness</b> | <b>0.031</b>    | (4.667, 1)      |
|                                 | Mortality                  | 0.238           | (1.392, 1)      |
|                                 | <b>Genotypic richness</b>  | <b>0.885</b>    | (0.021, 1)      |
| Decomposition rate              | <b>Functional richness</b> | <b>0.004</b>    | (8.154, 1)      |
|                                 | Mortality                  | 0.220           | (1.503, 1)      |
|                                 | <b>Genotypic richness</b>  | <b>0.140</b>    | (2.169, 1)      |
| Pelagic algae stock             | <b>Functional richness</b> | <b>0.690</b>    | (0.158, 1)      |
|                                 | Mortality                  | 0.893           | (0.018, 1)      |
|                                 | <b>Genotypic richness</b>  | <b>0.834</b>    | (0.044, 1)      |
|                                 | <b>Functional richness</b> | <b>0.053</b>    | (3.742, 1)      |
|                                 | Mortality                  | 0.412           | (0.673, 1)      |

635

636

637 **Table 2.** Model fits of the two confirmatory path-analyses to explain decomposition rate and  
638 algae stock. The full models included the effect of genotypic and functional richness on  
639 community components while the null model did not.

640

| Variable           | <i>C</i> | df | <i>p</i> -value | AIC full model | AIC null model |
|--------------------|----------|----|-----------------|----------------|----------------|
| Decomposition rate | 8.555    | 6  | 0.200           | 32.555         | 75.043         |
| Algae stock        | 6.745    | 10 | 0.749           | 52.745         | 64.679         |

641
